# Supplementary material for: Antigen-Specific CD4+ T Cells Regulate Function of Myeloid-Derived Suppressor Cells in Cancer via Retrograde MHC Class II Signaling
Source: Oxford University Press journal article supplement (doi:10.1158/0008-5472.can-11-2863), 2012-01-12
Supplement: 00085472can112863-sup-can_11-2863_f1-4_405k.pdf [file 00085472can112863-sup-can_11-2863_f1-4_405k.pdf]

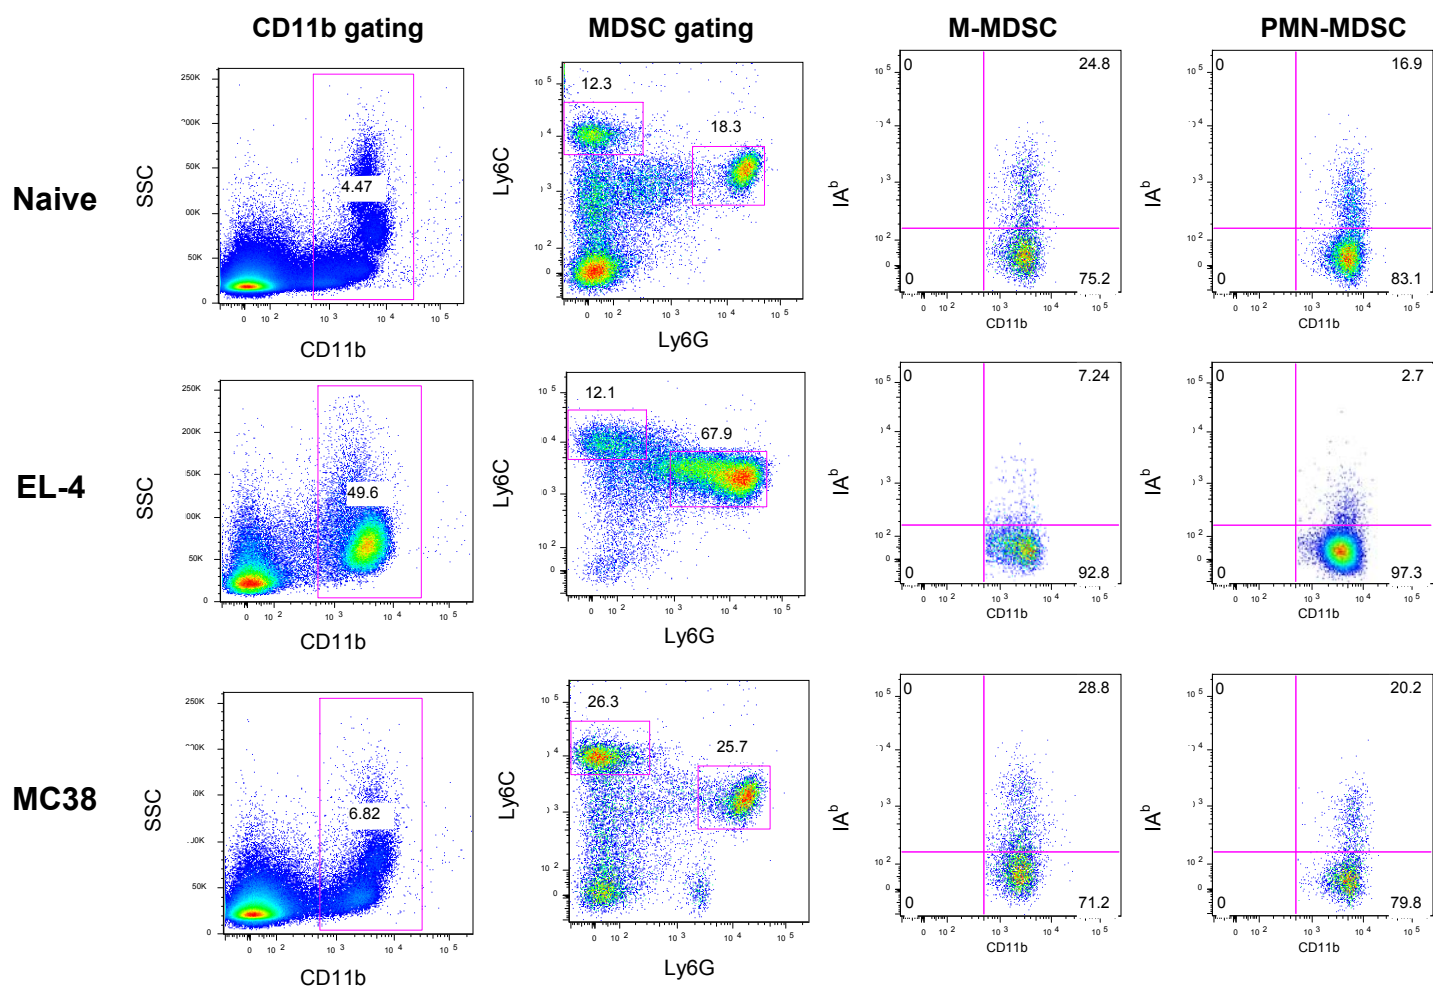

**Figure S1. Typical example of gating of MDSC populations in spleens of naïve tumor-free, EL-4, or MC38 tumor-bearing C57BL/6 mice**

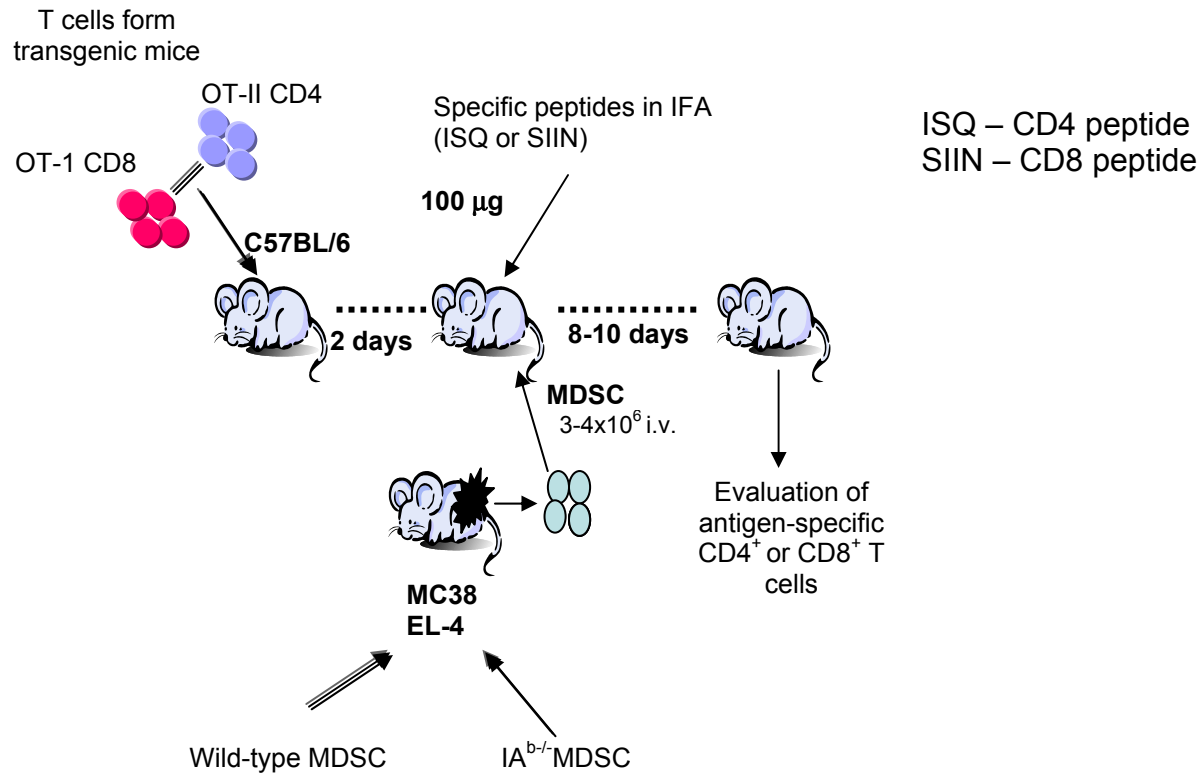

**Figure S2. Schema of the experiments to study MDSC mediated T-cell tolerance**

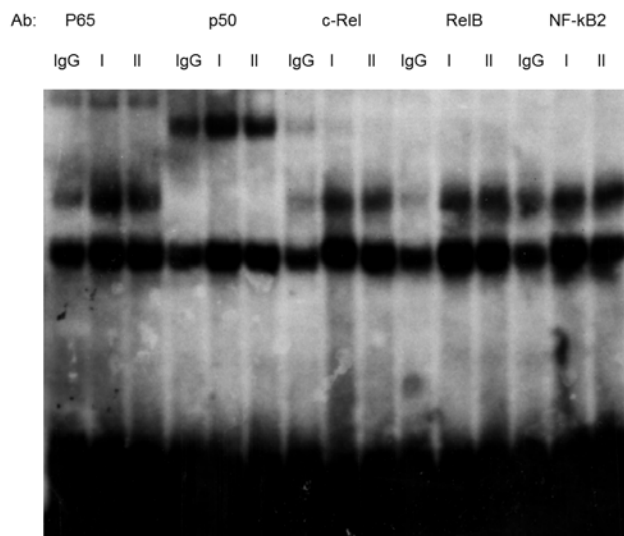

**Figure S3. Effect of MHC class I and class II cross-linking on activation of NF- $\kappa$ B.**

MDSC were isolated from spleens of MC38 tumor-bearing mice and incubated for 16 hr with immobilized IgG, MHC class I H2K<sup>b</sup> (I), or MHC class II IA<sup>b</sup> (II) specific antibodies. NF- $\kappa$ B activity was measured using EMSA as described previously (1, 2). EMSA shift assay using indicated antibodies against NF- $\kappa$ B subunits.

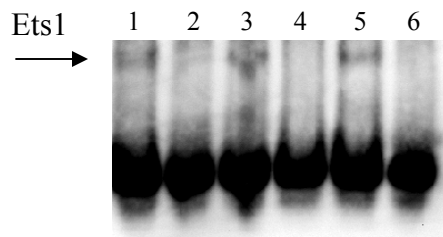

**Figure S4. Ets1 activation by crosslinking of IA<sup>b</sup>.** MDSC were isolated from spleens of MC38 tumor-bearing mice and cultured for 12 hr with immobilized control IgG (1,2), H2K<sup>b</sup> (3,4) or I-A<sup>b</sup> (5,6) antibodies. Nuclear extracts were prepared and incubated with labeled Ets1- specific probe. Lines 2, 4, and 6 – 2x excess of unlabeled probe was added.

## References

1. Cheng, P., Zlobin, A., Volgina, V., Gottipati, S., Osborne, B., Miele, L., & Gabrilovich, D. I. (2001) *J. Immunol.* 167, 4458-4467.
2. Nefedova, Y., Cheng, P., Gilkes, D., Blaskovich, M., Beg, A. A., Sefti, S. M., & Gabrilovich, D. I. (2005) *J Immunol* 175, 4338-4346.
